# Supplementary material for: Identification of the Complete Chloroplast Genome of Malus zhaojiaoensis Jiang and Its Comparison and Evolutionary Analysis with Other Malus Species
Source: MDPI journal article supplement (doi:10.3390/genes13040560), 2022-03-22
Supplement: s1 [file s1]

**Table S3.** RNA editing sites in *M. zhaojiaoensis* cp genome.

| Gene name    | Location of nucleotide | Location of amino acid | RNA editing        | Score |
|--------------|------------------------|------------------------|--------------------|-------|
| <i>ndhB</i>  | 149                    | 50                     | TCA (S) => TTA (L) | 1     |
|              | 467                    | 156                    | CCA (P) => CTA (L) | 1     |
|              | 542                    | 181                    | ACG (T) => ATG (M) | 1     |
|              | 586                    | 196                    | CAC (H) => TAC (Y) | 1     |
|              | 611                    | 204                    | TCA (S) => TTA (L) | 0.8   |
|              | 737                    | 246                    | CCA (P) => CTA (L) | 1     |
|              | 746                    | 249                    | TCT (S) => TTT (F) | 1     |
|              | 830                    | 277                    | TCA (S) => TTA (L) | 1     |
|              | 836                    | 279                    | TCA (S) => TTA (L) | 1     |
|              | 1,112                  | 371                    | TCA (S) => TTA (L) | 1     |
|              | 1,255                  | 419                    | CAT (H) => TAT (Y) | 1     |
|              | 1,481                  | 494                    | CCA (P) => CTA (L) | 1     |
| <i>ndhA</i>  | 341                    | 114                    | TCA (S) => TTA (L) | 1     |
| <i>ndhG</i>  | 314                    | 105                    | ACA (T) => ATA (I) | 0.8   |
|              | 494                    | 165                    | GCC (A) => GTC (V) | 0.8   |
| <i>ndhD</i>  | 313                    | 105                    | CGG (R) => TGG (W) | 0.8   |
|              | 383                    | 128                    | CCA (P) => CTA (L) | 1     |
|              | 599                    | 200                    | TCA (S) => TTA (L) | 1     |
|              | 674                    | 225                    | TCA (S) => TTA (L) | 1     |
|              | 878                    | 293                    | TCA (S) => TTA (L) | 1     |
|              | 887                    | 296                    | CCC (P) => CTC (L) | 1     |
|              | 1,298                  | 433                    | TCA (S) => TTA (L) | 0.8   |
| <i>ndhF</i>  | 1,405                  | 469                    | CTT (L) => TTT (F) | 0.8   |
|              | 290                    | 97                     | TCG (S) => TTG (L) | 1     |
|              | 392                    | 131                    | TCC (S) => TTC (F) | 1     |
|              | 1,502                  | 501                    | ACG (T) => ATG (M) | 0.8   |
|              | 1,876                  | 626                    | CTT (L) => TTT (F) | 1     |
| <i>rpoA</i>  | 830                    | 277                    | TCA (S) => TTA (L) | 1     |
| <i>petB</i>  | 418                    | 140                    | CGG (R) => TGG (W) | 1     |
|              | 611                    | 204                    | CCA (P) => CTA (L) | 1     |
| <i>clpP</i>  | 559                    | 187                    | CAT (H) => TAT (Y) | 1     |
| <i>petG</i>  | 13                     | 5                      | CTT (L) => TTT (F) | 0.86  |
| <i>psbE</i>  | 214                    | 72                     | CCT (P) => TCT (S) | 1     |
| <i>psbF</i>  | 77                     | 26                     | TCT (S) => TTT (F) | 1     |
| <i>psbL</i>  | 2                      | 1                      | ACG (T) => ATG (M) | 1     |
| <i>psaI</i>  | 83                     | 28                     | TCT (S) => TTT (F) | 0.86  |
| <i>accD</i>  | 64                     | 22                     | CGG (R) => TGG (W) | 1     |
|              | 854                    | 285                    | TCG (S) => TTG (L) | 0.8   |
|              | 1,463                  | 488                    | CCT (P) => CTT (L) | 1     |
| <i>atpB</i>  | 37                     | 13                     | CCT (P) => TCT (S) | 1     |
| <i>rps14</i> | 80                     | 27                     | TCA (S) => TTA (L) | 1     |
|              | 149                    | 50                     | CCA (P) => CTA (L) | 1     |
| <i>rpoB</i>  | 338                    | 113                    | TCT (S) => TTT (F) | 1     |
|              | 566                    | 189                    | TCG (S) => TTG (L) | 1     |
|              | 1,994                  | 665                    | TCT (S) => TTT (F) | 1     |
|              | 2,420                  | 807                    | TCA (S) => TTA (L) | 0.86  |
| <i>rpoC1</i> | 80                     | 27                     | ACC (T) => ATC (I) | 0.86  |

|              |       |       |                    |      |
|--------------|-------|-------|--------------------|------|
| <i>rpoC2</i> | 1,493 | 498   | ACG (T) => ATG (M) | 0.86 |
|              | 1,783 | 595   | CGT (R) => TGT (C) | 0.86 |
|              | 3,062 | 1,021 | TCT (S) => TTT (F) | 0.86 |
|              | 3,740 | 1,247 | TCA (S) => TTA (L) | 0.86 |
| <i>rps2</i>  | 248   | 83    | TCA (S) => TTA (L) | 1    |
| <i>atpI</i>  | 629   | 210   | TCA (S) => TTA (L) | 1    |
| <i>atpF</i>  | 92    | 31    | CCA (P) => CTA (L) | 0.86 |
| <i>atpA</i>  | 773   | 258   | TCA (S) => TTA (L) | 1    |
|              | 914   | 305   | TCA (S) => TTA (L) | 1    |
|              | 1,148 | 383   | TCA (S) => TTA (L) | 1    |
| <i>rps16</i> | 212   | 71    | TCA (S) => TTA (L) | 0.83 |
| <i>matK</i>  | 532   | 178   | CTC (L) => TTC (F) | 0.86 |
|              | 619   | 207   | CTC (L) => TTC (F) | 1    |
|              | 634   | 212   | CAT (H) => TAT (Y) | 1    |
|              | 923   | 308   | TCT (S) => TTT (F) | 0.86 |
|              | 1,184 | 395   | TCG (S) => TTG (L) | 0.86 |

---
