# Supplementary material for: Identification of the Complete Chloroplast Genome of Malus zhaojiaoensis Jiang and Its Comparison and Evolutionary Analysis with Other Malus Species
Source: MDPI journal article supplement (doi:10.3390/genes13040560), 2022-03-22
Supplement: s1 [file s1]

**Table S2.** Type and size of INEs in *M. zhaojiaoensis* cp genome.

| INE type | Repeats size | Repeat_1_position | Repeat_2_position | Repeats distance | E-value  |
|----------|--------------|-------------------|-------------------|------------------|----------|
| P        | 63           | 55,834            | 55,834            | -1               | 1.60E-26 |
| P        | 44           | 78,042            | 78,042            | 0                | 2.33E-17 |
| P        | 48           | 10,224            | 10,224            | -2               | 9.23E-16 |
| F        | 40           | 62,708            | 62,727            | 0                | 5.96E-15 |
| F        | 40           | 102,751           | 125,440           | 0                | 5.96E-15 |
| P        | 40           | 125,440           | 145,277           | 0                | 5.96E-15 |
| F        | 38           | 39,097            | 39,124            | 0                | 9.53E-14 |
| F        | 39           | 46,586            | 102,753           | -1               | 2.79E-12 |
| P        | 39           | 46,586            | 145,276           | -1               | 2.79E-12 |
| F        | 38           | 46,586            | 125,442           | -1               | 1.09E-11 |
| P        | 30           | 8,343             | 48,047            | 0                | 6.24E-09 |
| F        | 34           | 54,421            | 54,455            | -2               | 1.23E-07 |
| F        | 34           | 95,430            | 95,448            | -2               | 1.23E-07 |
| P        | 34           | 95,430            | 152,586           | -2               | 1.23E-07 |
| P        | 34           | 95,448            | 152,604           | -2               | 1.23E-07 |
| F        | 34           | 152,586           | 152,604           | -2               | 1.23E-07 |
| P        | 31           | 195               | 195               | -1               | 1.45E-07 |
| F        | 33           | 111,706           | 111,737           | -2               | 4.64E-07 |
| P        | 33           | 111,706           | 136,298           | -2               | 4.64E-07 |
| P        | 33           | 111,737           | 136,329           | -2               | 4.64E-07 |
| F        | 33           | 136,298           | 136,329           | -2               | 4.64E-07 |
| P        | 32           | 54,685            | 54,685            | -2               | 1.74E-06 |
| R        | 32           | 70,856            | 70,856            | -2               | 1.74E-06 |
| F        | 31           | 71,546            | 71,572            | -2               | 6.53E-06 |
| P        | 33           | 13,874            | 13,874            | -3               | 1.44E-05 |
| P        | 30           | 113,964           | 113,964           | -2               | 2.44E-05 |
| F        | 30           | 113,964           | 134,074           | -2               | 2.44E-05 |
| P        | 30           | 134,074           | 134,074           | -2               | 2.44E-05 |
| F        | 32           | 41,597            | 43,821            | -3               | 5.23E-05 |
| F        | 32           | 93,008            | 93,029            | -3               | 5.23E-05 |
| P        | 32           | 93,008            | 155,007           | -3               | 5.23E-05 |
| P        | 32           | 93,029            | 155,028           | -3               | 5.23E-05 |
| F        | 32           | 155,007           | 155,028           | -3               | 5.23E-05 |
| P        | 31           | 199               | 17,289            | -3               | 1.89E-04 |
| F        | 31           | 8,342             | 38,274            | -3               | 1.89E-04 |
| F        | 31           | 10,453            | 10,493            | -3               | 1.89E-04 |
| P        | 31           | 52,216            | 68,655            | -3               | 1.89E-04 |
| C        | 30           | 10,232            | 34,361            | -3               | 6.85E-04 |
| F        | 30           | 10,314            | 10,336            | -3               | 6.85E-04 |
| P        | 30           | 38,275            | 48,047            | -3               | 6.85E-04 |
| F        | 30           | 54,589            | 54,664            | -3               | 6.85E-04 |
| F        | 30           | 54,647            | 54,671            | -3               | 6.85E-04 |
| F        | 30           | 62,699            | 62,737            | -3               | 6.85E-04 |

F: forward repeat; R: reverse repeat; C: complement repeat; P: palindromic repeat.
