# Supplementary material for: Identification of the Complete Chloroplast Genome of Malus zhaojiaoensis Jiang and Its Comparison and Evolutionary Analysis with Other Malus Species
Source: MDPI journal article supplement (doi:10.3390/genes13040560), 2022-03-22
Supplement: s1 [file s1]

**Table S1.** Type and number of SSRs in *M. zhaojiaoensis* cp genome.

| SSR type | SSR sequence                                                                                | SSR length | Start  | End    |
|----------|---------------------------------------------------------------------------------------------|------------|--------|--------|
| c        | (T)14agt(A)15                                                                               | 32         | 196    | 227    |
| p1       | (T)11                                                                                       | 11         | 1,631  | 1,641  |
| p1       | (T)11                                                                                       | 11         | 2,784  | 2,794  |
| p1       | (A)11                                                                                       | 11         | 5,664  | 5,674  |
| p1       | (A)10                                                                                       | 10         | 6,834  | 6,843  |
| p1       | (A)12                                                                                       | 12         | 6,990  | 7,001  |
| p1       | (T)11                                                                                       | 11         | 7,117  | 7,127  |
| p1       | (A)13                                                                                       | 13         | 7,890  | 7,902  |
| p1       | (T)11                                                                                       | 11         | 9,321  | 9,331  |
| p1       | (T)10                                                                                       | 10         | 12,402 | 12,411 |
| p1       | (T)14                                                                                       | 14         | 13,121 | 13,134 |
| p1       | (T)11                                                                                       | 11         | 13,475 | 13,485 |
| p1       | (A)12                                                                                       | 12         | 14,446 | 14,457 |
| p1       | (C)10                                                                                       | 10         | 14,981 | 14,990 |
| p1       | (A)12                                                                                       | 12         | 15,195 | 15,206 |
| p1       | (T)15                                                                                       | 15         | 15,450 | 15,464 |
| p1       | (T)14                                                                                       | 14         | 17,295 | 17,308 |
| p1       | (T)11                                                                                       | 11         | 19,542 | 19,552 |
| p2       | (TA)5                                                                                       | 10         | 20,923 | 20,932 |
| p1       | (T)10                                                                                       | 10         | 27,244 | 27,253 |
| p1       | (T)12                                                                                       | 12         | 27,889 | 27,900 |
| p1       | (A)12                                                                                       | 12         | 28,322 | 28,333 |
| p1       | (A)12                                                                                       | 12         | 28,742 | 28,753 |
| c        | (TA)5ttatatatacgtaattaaatagatttc(TA)5                                                       | 47         | 31,139 | 31,185 |
| p4       | (TTTA)3                                                                                     | 12         | 31,804 | 31,815 |
| p1       | (A)14                                                                                       | 14         | 32,141 | 32,154 |
| p1       | (T)19                                                                                       | 19         | 33,077 | 33,095 |
| c        | (TA)5atatagatgcatgatccagcaagcatgccctttgttaaagt(A)13tg<br>gattcatggtaaaatccttacatgatgca(T)14 | 109        | 38,504 | 38,612 |
| c        | (A)11taaaatgaaat(TTTA)3                                                                     | 34         | 39,222 | 39,255 |
| c        | (T)10gtc(A)10                                                                               | 23         | 39,552 | 39,574 |
| p1       | (A)10                                                                                       | 10         | 45,191 | 45,200 |
| p1       | (T)10                                                                                       | 10         | 45,720 | 45,729 |
| p1       | (A)10                                                                                       | 10         | 47,550 | 47,559 |
| p2       | (AT)5                                                                                       | 10         | 49,801 | 49,810 |
| p1       | (A)13                                                                                       | 13         | 50,237 | 50,249 |
| c        | (T)10agtatttttttttagccacccaataact(A)21                                                      | 63         | 52,188 | 52,250 |
| p1       | (T)10                                                                                       | 10         | 53,664 | 53,673 |
| p2       | (TA)5                                                                                       | 10         | 54,692 | 54,701 |
| p1       | (T)10                                                                                       | 10         | 57,764 | 57,773 |
| p1       | (T)20                                                                                       | 20         | 60,495 | 60,514 |
| p2       | (TA)5                                                                                       | 10         | 62,611 | 62,620 |
| p2       | (TA)5                                                                                       | 10         | 62,801 | 62,810 |
| p2       | (TC)5                                                                                       | 10         | 64,631 | 64,640 |
| c        | (T)16atatatagggtttattttatcataaccc(T)14                                                      | 57         | 66,879 | 66,935 |
| p1       | (G)14                                                                                       | 14         | 68,226 | 68,239 |
| p1       | (T)18                                                                                       | 18         | 68,656 | 68,673 |

|    |                                                                                 |    |         |         |
|----|---------------------------------------------------------------------------------|----|---------|---------|
| p1 | (A)12                                                                           | 12 | 68,986  | 68,997  |
| p2 | (AT)5                                                                           | 10 | 70,057  | 70,066  |
| p1 | (A)16                                                                           | 16 | 70,907  | 70,922  |
| p2 | (AT)6                                                                           | 12 | 71,525  | 71,536  |
| p1 | (T)11                                                                           | 11 | 72,075  | 72,085  |
| p1 | (T)13                                                                           | 13 | 72,794  | 72,806  |
| p1 | (T)14                                                                           | 14 | 74,243  | 74,256  |
| c  | (A)12gaatcaatgtgtagatgtagattctagcgcttcttta(T)19                                 | 70 | 74,925  | 74,994  |
| p2 | (AT)5                                                                           | 10 | 75,935  | 75,944  |
| p1 | (A)10                                                                           | 10 | 81,711  | 81,720  |
| c  | (T)16acttattat(TTTA)3                                                           | 38 | 83,298  | 83,335  |
| p1 | (T)10                                                                           | 10 | 84,463  | 84,472  |
| c  | (T)10atcggtttttcttttcaatgcaaaggtataaat(A)14                                     | 59 | 84,950  | 85,008  |
| p1 | (T)19                                                                           | 19 | 86,285  | 86,303  |
| p1 | (T)10                                                                           | 10 | 104,086 | 104,095 |
| p5 | (GGCAA)3                                                                        | 15 | 104,414 | 104,428 |
| p1 | (A)11                                                                           | 11 | 112,075 | 112,085 |
| p4 | (TTTA)3                                                                         | 12 | 112,480 | 112,491 |
| p2 | (TA)5                                                                           | 10 | 113,277 | 113,286 |
| c  | (A)21tatcttaattaattgtttctgagtcaccggttcttatttcttttctttgaaa<br>ggggtcggttaat(A)10 | 98 | 116,674 | 116,771 |
| p1 | (T)14                                                                           | 14 | 117,534 | 117,547 |
| p2 | (AT)6                                                                           | 12 | 118,614 | 118,625 |
| p1 | (T)11                                                                           | 11 | 123,963 | 123,973 |
| p2 | (AT)5                                                                           | 10 | 124,792 | 124,801 |
| p1 | (T)10                                                                           | 10 | 125,876 | 125,885 |
| p1 | (A)10                                                                           | 10 | 126,431 | 126,440 |
| p1 | (T)10                                                                           | 10 | 131,803 | 131,812 |
| p1 | (A)16                                                                           | 16 | 132,434 | 132,449 |
| p2 | (AT)5                                                                           | 10 | 134,782 | 134,791 |
| p4 | (AATA)3                                                                         | 12 | 135,576 | 135,587 |
| p1 | (T)11                                                                           | 11 | 135,984 | 135,994 |
| p5 | (CCTTG)3                                                                        | 15 | 143,639 | 143,653 |
| p1 | (A)10                                                                           | 10 | 143,974 | 143,983 |

p1 refers to mononucleotide repetition, p2 refers to dinucleotide repetition, c refers to compound repetition.
